# Supplementary material for: Solvent hydrolysis leads to an unusual Cu(ii) metal–organic framework
Source: Royal Society of Chemistry journal article supplement (doi:10.1039/b603274e), 2006-01-01
Supplement: b603274e.pdf [file b603274e.pdf]

## Supplementary Material

### Solvent hydrolysis leads to an unusual Cu(II) metal-organic framework

Samuel M. Hawxwell and Lee Brammer\*

*Department of Chemistry, University of Sheffield, Sheffield S3 7HF, UK. Email:  
lee.brammer@sheffield.ac.uk*

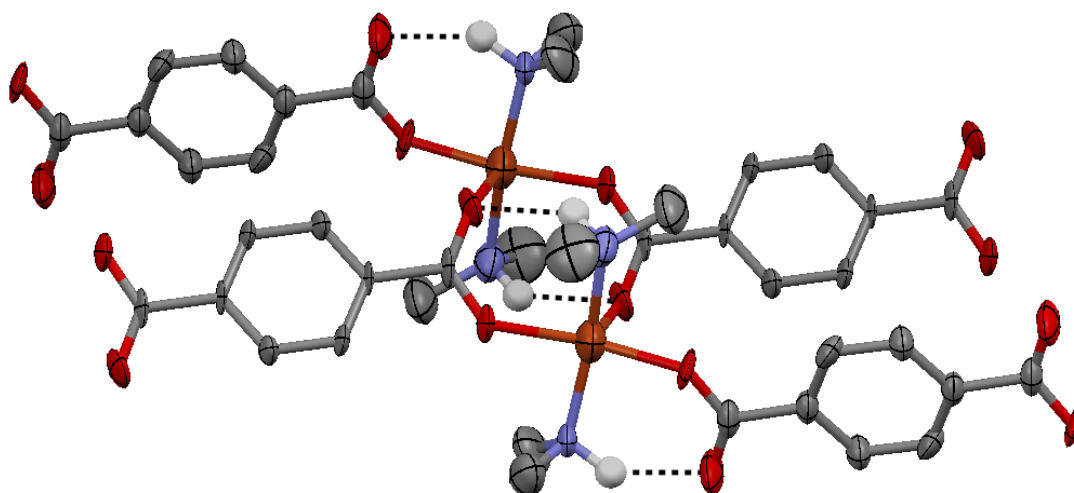

**Figure S1.** View of **1** with atoms represented as 90 % probability ellipsoids showing the SBU. (H atoms on diethylamine molecules shown as spheres of arbitrary radius; other H atoms not shown).
